# Supplementary material
Source: PubMed Central journal article supplement (PMC33193)

**a**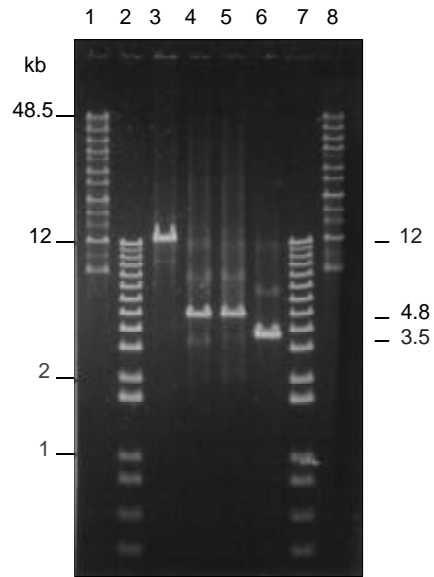**b**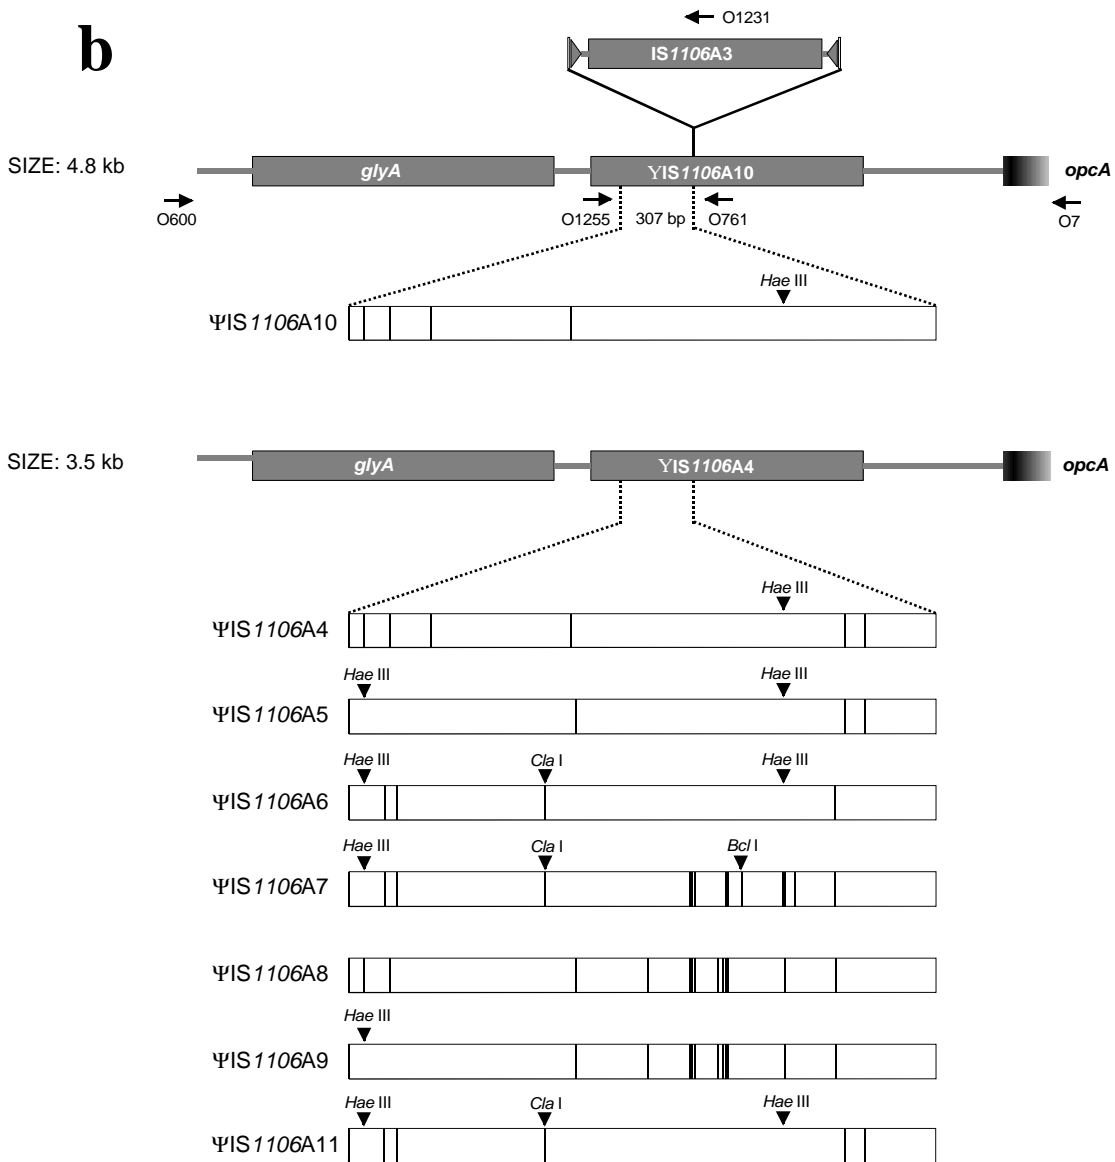

Supplement: pnas_061386098_3.pdf [file pnas_061386098_3.pdf]

Ancestral: *pgm3 iga2 opaB92 opaD131 tbpB1*

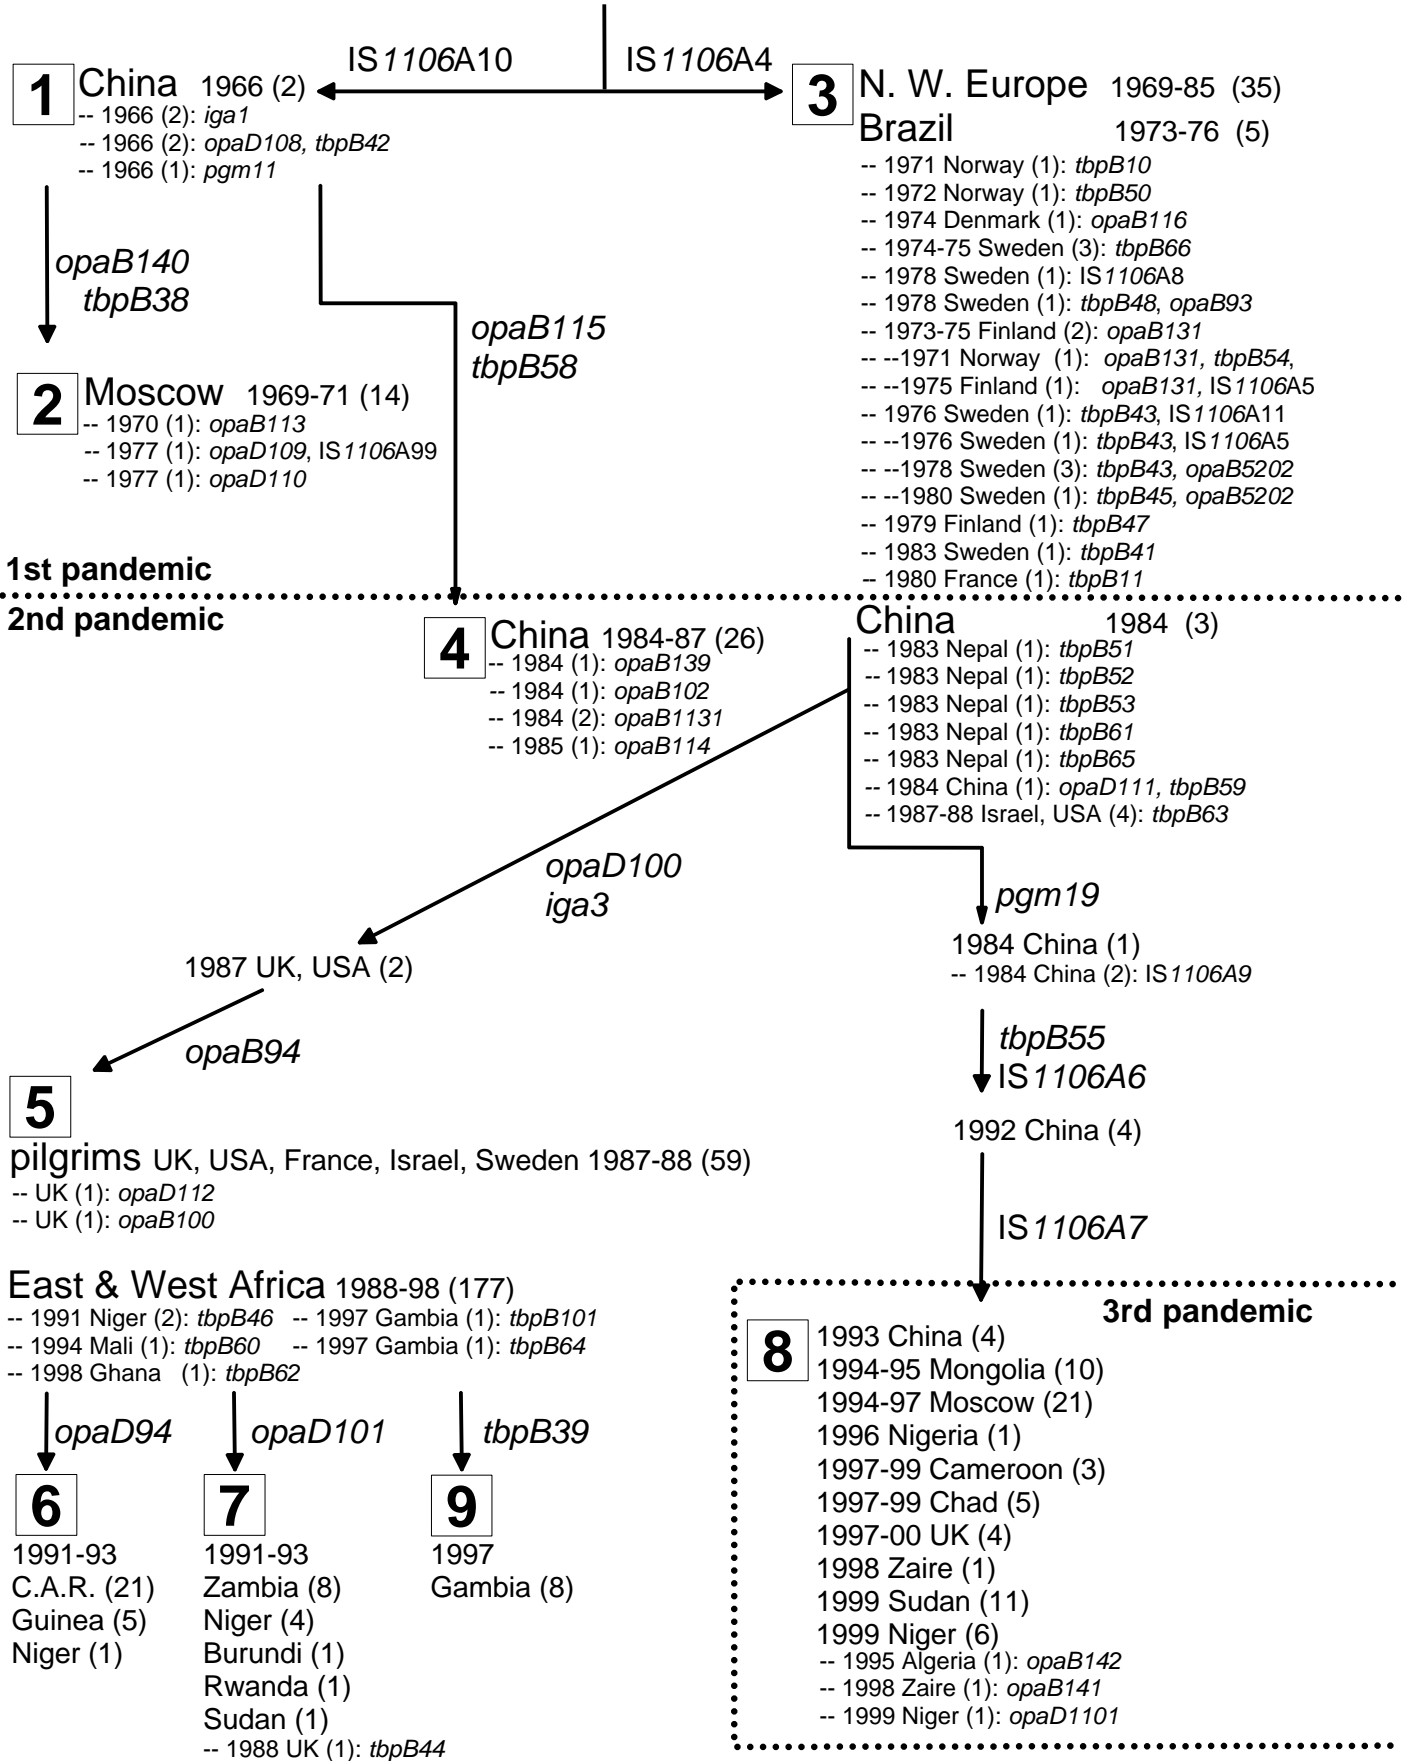

Supplement: pnas_061386098_5.pdf [file pnas_061386098_5.pdf]
